# Supplementary material for: Switchable supracolloidal 3D DNA origami nanotubes mediated through fuel/antifuel reactions
Source: Royal Society of Chemistry journal article supplement (doi:10.1039/d0nr04209a), 2020-01-01
Supplement: d0nr04209a1.pdf [file d0nr04209a1.pdf]

**Supporting Information for:**

**Switchable Supracolloidal 3D DNA Origami  
Nanotubes Mediated through Fuel/Antifuel  
Reactions**

*Saskia Groeer<sup>a-c</sup>, Andreas Walther<sup>a-d\*</sup>*

a. A<sup>3</sup>BMS Lab – Active, Adaptive and Autonomous Bioinspired Materials, Institute for Macromolecular Chemistry, University of Freiburg, Stefan-Meier-Straße 31, 79104 Freiburg, Germany

b. Freiburg Materials Research Center (FMF), University of Freiburg, Stefan-Meier-Str. 21, 79104 Freiburg, Germany

c. Freiburg Center for Interactive Materials and Bioinspired Technologies (FIT), University of Freiburg, Georges-Köhler-Allee 105, 79110 Freiburg, Germany

d. Cluster of Excellence livMatS @ FIT, 79110 Freiburg, Germany

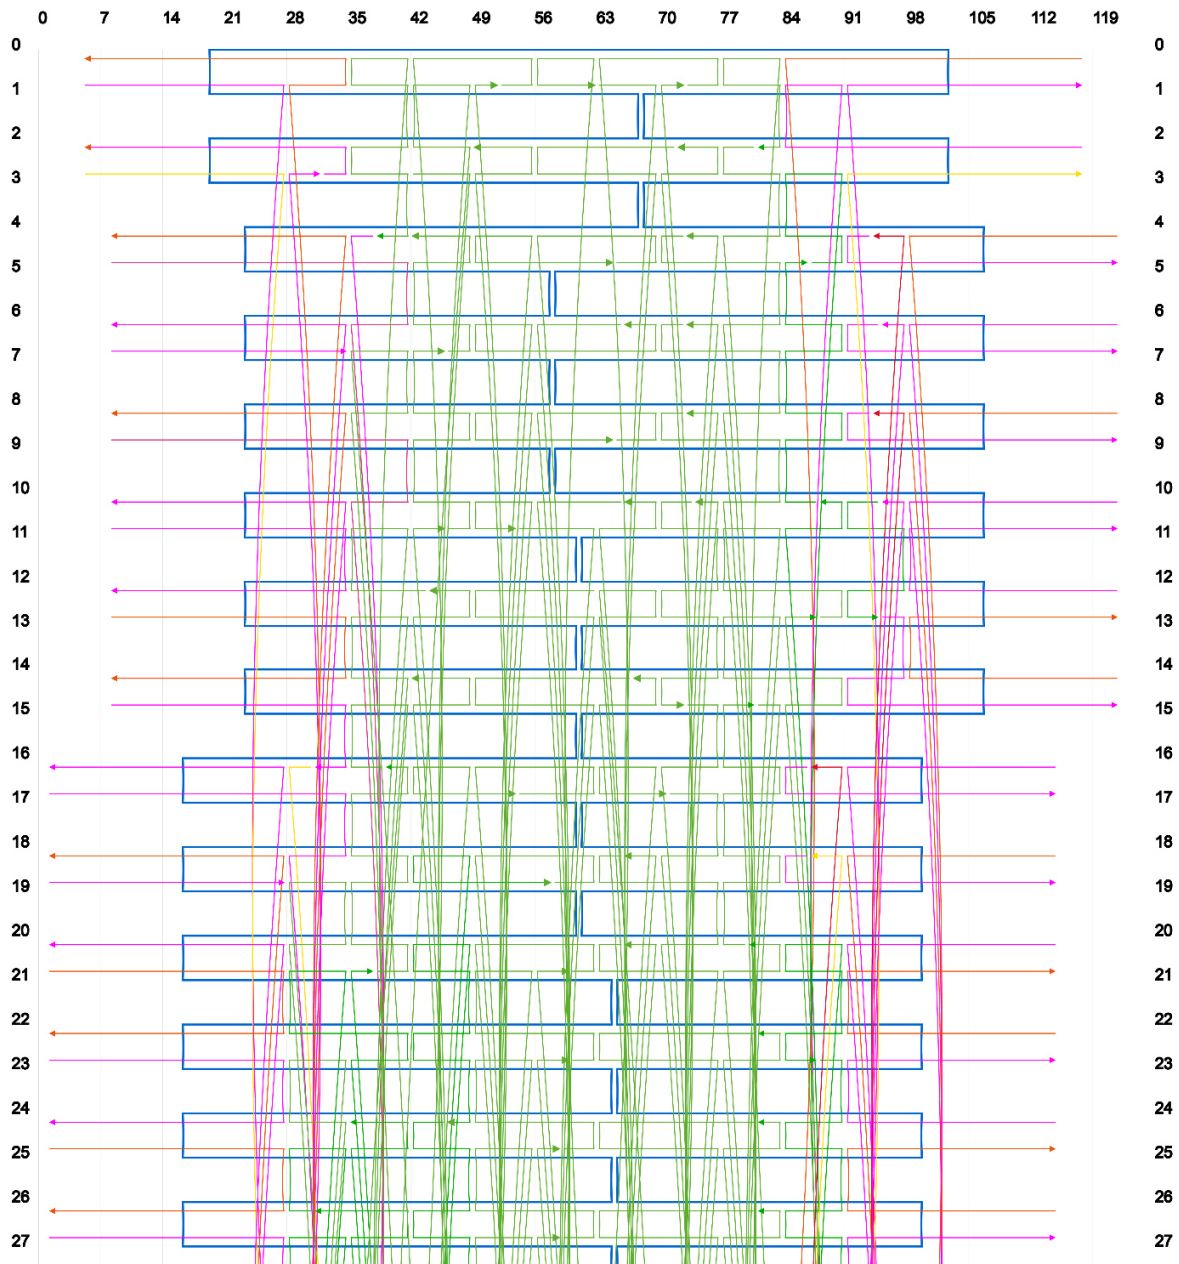

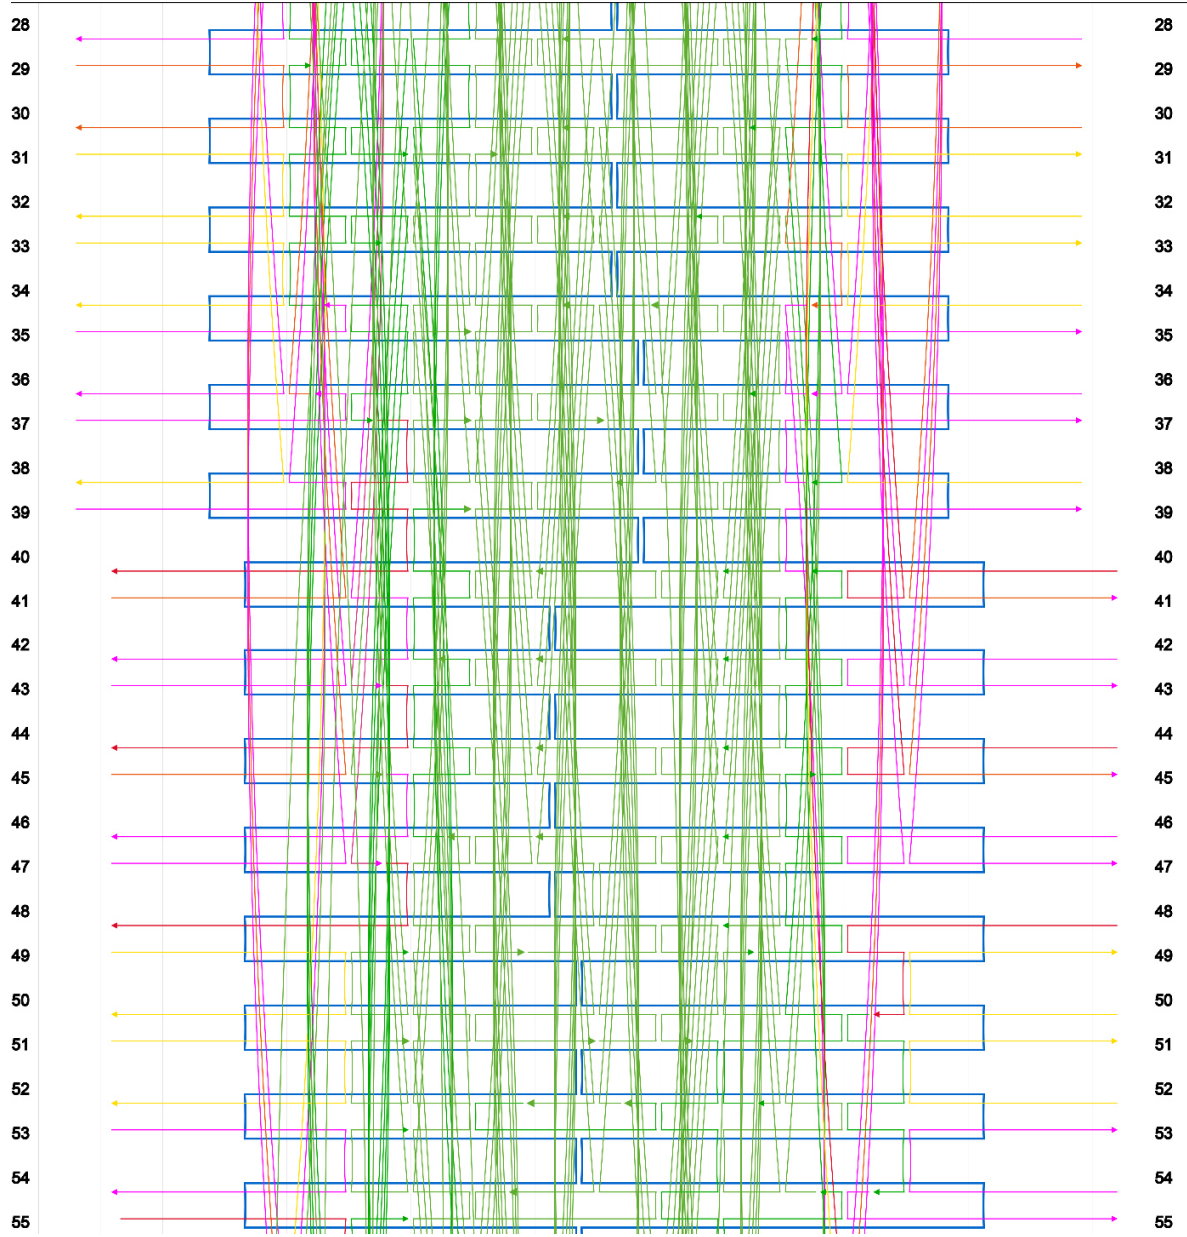

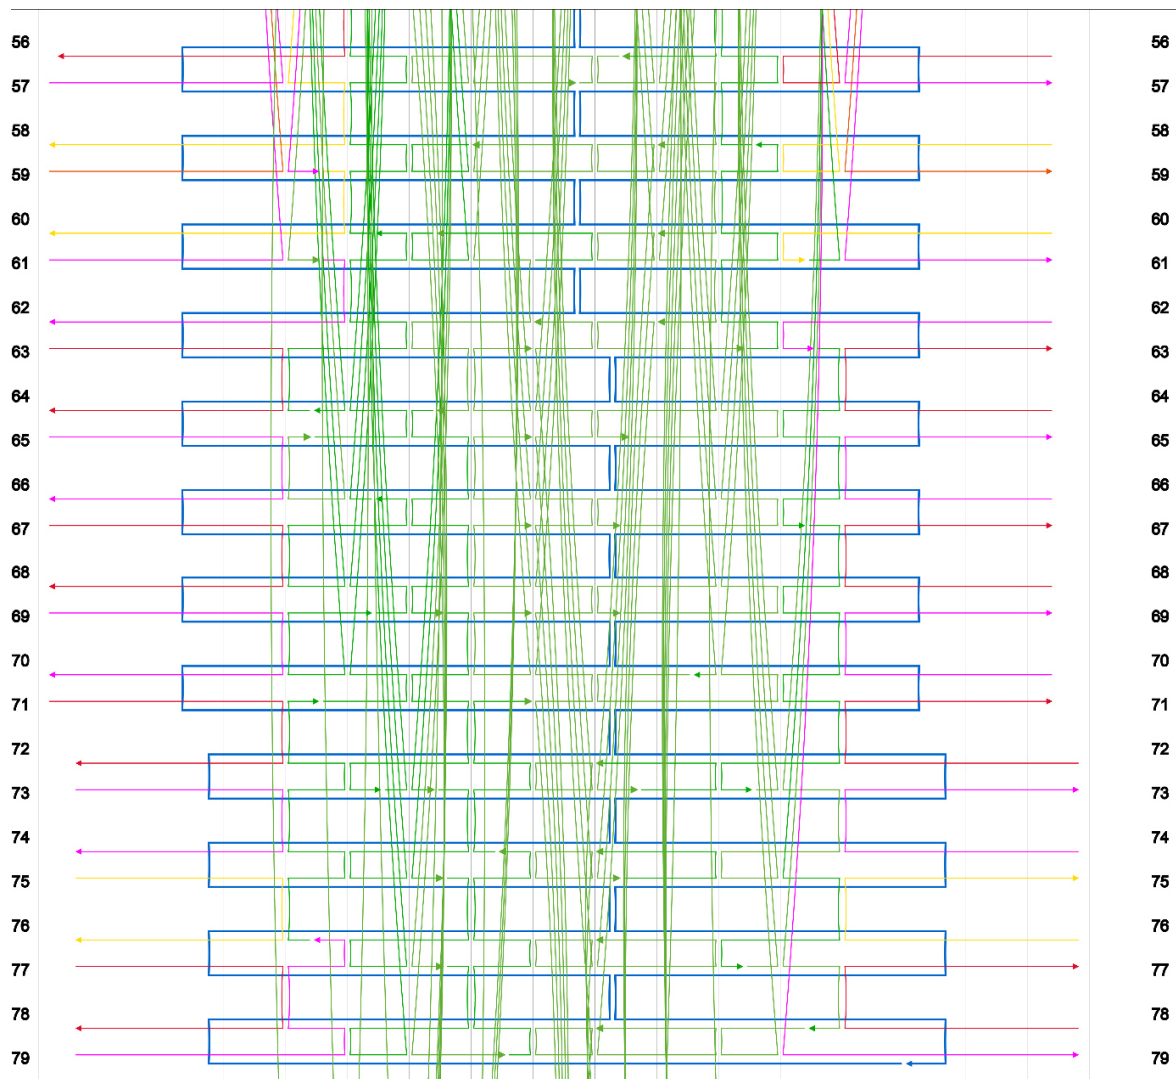

**Figure S1. 3D-DNA-NC folding map.** Scaffold is depicted in blue, core staple strands in green, poly-thymine passivated strands in pink and connector overhangs in red (8 connectors), orange (16 connectors) and yellow (24 connectors).

**Table S1. Sequences of core staples.** Names denote both the function of the staple strand and its position according to the line numbers in Figure S1: [function- 5' position – 3' position].

| Name       | Core staples 5'→3'                             |
|------------|------------------------------------------------|
| core-2-42  | GTG CGG AGT GTG TCA TAC AAA AGG TCA GAG GC     |
| core-69-73 | CCC ATA GCT GGA AGC ATG CTA ACT CAC ATT AGG GA |
| core-61-60 | ATT CTC CGA GAA CGC CAT CAA AAA T              |
| core-29-69 | TAT TTT AAT AAA TTA CCT TGT GAA AAG GTC GAC TC |
| core-65-21 | GGA AAC CAG GCG ATC GCA TCC                    |

|            |                                                                   |
|------------|-------------------------------------------------------------------|
| core-26-66 | GTT CTG CTC AAC GAC GGA GGG GGA TGT GCT GTC GG                    |
| core-77-37 | TGA AAT CAA AAG AAT AGG AAC AAG ATT CAT TAA ACG AGC AAA GCG AAG   |
| core-20-65 | TAC GGT AAG AAA AGT AAC GAC AAC TCG TAG AGC GA                    |
| core-58-19 | ATT TAA ACT CAT TTT GCC ACT ATC TTT GAC CCC CAG C                 |
| core-31-69 | CCC TAC ATT CAT CAT CAG CGT TGG GAA CTG GCC ATG GTC CGG GTA C     |
| core-69-24 | TAG ATT GTA AAT TCA GTG AGA ACC G                                 |
| core-42-39 | GAT GTC TGG AAA TGC TGA AGA GGT                                   |
| core-5-38  | CAG AAG TAA GCA CTG GTA CTA A                                     |
| core-42-6  | ATA TAA CTT TCG CAC ATA GTT TCT GTA TGG TCA GAG CCA CCA TTG G     |
| core-54-52 | AGC ATC AAC CGT TAT TCA TTA AAG GGG GAA TTA AT                    |
| core-76-71 | GGT TCT TTT CGC GTA TTT CCA GTC ATT GCG TCA AC                    |
| core-21-16 | GCG AAG TAC AAA ACA CTC ACG AAG GTC ATG AGC GA                    |
| core-61-23 | TTC CCC GAG GAG CCG AAC AAT AGC TTA AG                            |
| core-37-1  | GCT TCA ATC AAT AAC TCA TCG TT                                    |
| core-56-17 | ATT TAG ATT TGT TTA CCT ATA AAA G                                 |
| core-60-55 | GTC AAA TCA GTT GTA AAA GAA AAG ATC GTA ACA TTG CC                |
| core-46-11 | GTA GTA GCA ATA AAA ATA ATT TAT CG                                |
| core-32-1  | GAT ATA GCG TGA GAA GGG AAT AGG                                   |
| core-1-32  | AAT GCT GAG ACT CCT CAA CCA GGC TTA TCC GGT GA                    |
| core-2-38  | TAA ACA CCG TAC TCA GGG GAT AGC AAG CGA ACC AA                    |
| core-17-57 | AAA CGG GCA AGG CGA AAG ACA GCA ACA GGA AGA TT                    |
| core-73-72 | AGT CTT TAA CCA GCA GAA GAT GG                                    |
| core-30-75 | ACC CGT TTA CCA TCA AGA TTA GTT GCG TCT TTC CAG AGC CT            |
| core-52-10 | CAA TCG TCG CTA TTA ATT ATA GCT TCG ACA GAC GT                    |
| core-70-26 | CAG CAA ATG ATG GAA AAC AGA GGT GAG GCG GTT GAG AGC AAA TAG CGA A |
| core-15-13 | CAT AAA GAA GAT TAC ATT TAA CAA GTA CAT AAG AG                    |
| core-71-26 | ATA CGA GCC GTT TCC TGT ATG CGA GGC TTG AGA TG                    |
| core-4-44  | CTT TAA ATC CTC ATT AAG GCA GGT GTA GGG CTA TGC GT                |
| core-63-67 | TTA CTT TAC ACA TTT GAT AGG AGC TGA                               |
| core-49-45 | CAT AGG TCT GGG GTT ATG AAA ACT TGA CCT AAT AA                    |
| core-1-79  | CCC GAT TAG GAT TAG CGG AAT GTT TCA TAA ATA GTC CAC TAT T         |
| core-78-36 | GCT CAT GGA AAG GGC GAC AAG CAA AGC CGT TGT AC                    |
| core-66-64 | TGC TGT ACA GTA AGG GAA CCG AAC GTC GAA ACT CC                    |
| core-25-65 | CGA GTC ATC AAG AGT AAT GCA TAG GGT TGG GAC ATT CGC               |

|            |                                                                    |
|------------|--------------------------------------------------------------------|
| core-67-73 | GGA ATC AAT CAT TGC TGA GCC ACG CCA GTA TTT ACC GAA CGA ACC ATG CG |
| core-18-62 | GGC AAG AAC TGG CAT GAT AAT AAC GCG GAA TCG GAA CA                 |
| core-14-54 | CCG TCA CGC ATA ACC GAT TCA CCC TCA GCA CGA TAA TGC CGG            |
| core-49-46 | GCC TTT AAT AGT GAA ATG CTG AAT CGC AAA AAT ACC GAC CGT A          |
| core-33-4  | TAA GGT TTT GGG TTG ATC CAC CCT GAG CCA CCT GA                     |
| core-6-42  | CCT TGA TAC TAA ATA AAG CCA ACG AGC CAG TAA TAA CC                 |
| core-34-78 | TAG AAA GAC TCC AAC GTC AAA TAC CTA CAT TTG G                      |
| core-60-24 | AAT TAA CAA CGA AAC AAC CTG CTC TCA ATC AAC CAG GCC TT             |
| core-19-58 | GAT AAA ATA AAA TAC GTA ATT TAA CCA ATA GTT TGG TAT AAG CAA AT     |
| core-38-2  | AGC GAA CCA GCG GAT GGC TTA TTT ATC AAC TGT AGA ATG ATA CAC CGT A  |
| core-20-15 | CAA TTA AGA CAA ATA CAA AAG ACA AGA AAA TGC GA                     |
| core-44-9  | GTC AAT ATT CTA CTT TTT GCT GAA TTG CGA TAT TAG C                  |
| core-45-40 | ACA AGT ATC ATT AAT TGA TTT AGG AAA GTA ATC AG                     |
| core-23-28 | AGC TAA TAT CAC AAA GTA AAC AGG AGC CTT TCA AA                     |
| core-5-40  | ACA AAT TCC AAT AGG AAC CTT GAG AAT ATA AAG TGG AGC TTA ATT GC     |
| core-24-69 | GAG ATA ACC CAC AAG ACT AAA ATT AAC TGA ACG TCA GTT GGC AAC CGA A  |
| core-36-40 | CGC ATC GGC TAC GAG CAA ATA GAT ATG CAG A                          |
| core-64-69 | GAA AAA GCG CAG GGC GAC AAG GCG CAC GAC GGG AT                     |
| core-27-67 | TTA TAC CAG AAC GAG TAG CTT GCC CTC CCA GTA TTA AGT                |
| core-50-54 | GCG AAT TTT CGG AAA CAT TTC ATT CAA T                              |
| core-21-64 | GCC CCT ATA CCA AGC GCC CGT CGG GGA ACA AAC GGC GGT GCA TCT TCA G  |
| core-75-74 | CTG GCC AAC AGT TTT GAA TGG CTA A                                  |
| core-73-75 | AAC ATC TAC GAC AGG TAG AAA GAT ACT AAT GAG AC                     |
| core-65-20 | GCC GTC AAT AGA TAA TAA ACA ATT GCA GAT AAA CG                     |
| core-10-13 | AGC GAT CAA GTC ATT AGC GCA A                                      |
| core-67-22 | TCA ACA GTT GAA AGG AAT ACT AAC ACC AAT AAA TC                     |
| core-9-44  | GTT TGG AAC CGC CAC CCG AAA TGT GAT AAA TAA ATT CTT ACC AGT TG     |
| core-28-73 | GGA TTG AGA TTT AGC CTA ATT TGC TTT TTT GTT TAA CAT GAT T          |
| core-6-46  | CGA CCC TCA GAG CCG CCA GCC GCC AAT AAG AAA TTT AA                 |
| core-17-60 | AAA CGC TAC ATA ATG AAT AAA TCC TGA                                |
| core-13-49 | CCA AAG GCC GGA AAC GTT CAG TAG AGA TTA AAA AT                     |
| core-63-58 | GAA CCA TTT TGT ATC ATC CAA TAT ATG GAA GGG TA                     |
| core-51-56 | AAT ATA TGT GAA AAT TAA TGA TGA TTT GAA TAA CAA TAA CGG            |

|            |                                                                      |
|------------|----------------------------------------------------------------------|
| core-30-78 | CGA GCT ATT TTG CAC CCC TTG CGG ATG GAT TAA AC                       |
| core-32-76 | AGC CTT AAA GAT CTG ACG CTC AAT CTA AAA GGG ACA TTT                  |
| core-51-10 | TTG CTT CAG AAG AGT AGC AGC TCA T                                    |
| core-7-37  | TTT AGC GTA ACA TTC CAC GTA ACA CAC CCT CAG CAA ACC AAA TAT          |
| core-16-53 | GGG TCT TTT GCA TTT TTG TAT TCA A                                    |
| core-24-73 | GAC AAA TAA GGT AAA TTG TTT TAA GAA GAA AAC TG                       |
| core-12-49 | AAT TTC TTA GGA GCC TAA TTT TTG TAA TAC                              |
| core-10-49 | AGC CCC CTA TGC ATC CAT GCA ACT CAG AGC AGG AGA A                    |
| core-11-51 | GTT TAT CGA TCA TTT CAA CGC AAG TGT AGG TAA AGC C                    |
| core-40-5  | TGA ATA TAG TTT CAC ATG TAC CAG ACA GCC TTC ACA A                    |
| core-79-74 | AAA CCT TAT ATG GTG GTT GGC CCT CAA CAG CAC GC                       |
| core-26-70 | GCG CAT TAG ACG GGA GAC ACC GTC AAA AAT GAC AG                       |
| core-57-17 | CGC GAG AGA ATC GAT GAA CGG TAC CCC AAA ATC GGA AGA AGT TTC<br>CAT T |
| core-77-2  | TGA AGA GGT TTT ATT CTA TAA GAG GCC CCC TGA CA                       |
| core-1-37  | TGT ATC AGA TTT ACC CTG ACT TAA TTC GA                               |
| core-28-30 | TAA ACT GAT AGG CAC AGA CAA TAT AGA TAG ACT AA                       |
| core-69-24 | AAA ATC TAA AGC ATC ACC ATA TCT GAC CCT GAA GA                       |
| core-73-31 | TCG TGG GAG AGG CGG TTT ACC AGT GCA GAT ACG AGC AAC                  |
| core-29-77 | AAA ATA AAC CAA CGA CCC TTC CAC ACG ACC AGT AAG TC                   |
| core-10-5  | TTT CTC AAA ATC CCT CAG ACC AGA AAG GTT GAA GC                       |
| core-11-7  | TTG TTT TCA CAC TAA AGA AAC AAC TGA A                                |
| core-75-33 | GGG GAG AGA GTT GCA GCA AAA TCC CGA GAG GAT AG                       |
| core-22-67 | TTA CCG AAG CCC TTT TAA ACA TTG AGT TAA GCA CTA ATA GAT TAT GCG<br>A |
| core-12-52 | TCA GCT TGC TTT CGA ACC ATC GCC CAC CAA ATT CAA                      |
| core-34-34 | GCG AAA AAT CAG GTC GAA CAA GCA ATC AGA TA                           |
| core-15-58 | AAG GTC ATA TGT CAG GTT AGA AAT A                                    |
| core-8-48  | TCA CCA TCT TTT CAT AAA TCG GCA AAC GCG AAT AAC TA                   |
| core-52-52 | AAG GGT AGC TGA TAA ATT CAA GAA AAC AGT G                            |
| core-23-63 | CTG CGA GGC GCA GAC GGC ATG TTA ATC GGC CGC CAG TT                   |
| core-10-15 | TCG GAC CGT AAC ACC AAT GCC ATT TTG AAT TAC AA                       |
| core-46-42 | TAA CGC ATC AAA CCT GTT AGA TAC AAG TT                               |
| core-64-60 | AGC GCG CAT CGT AAC CGA TTG ACC GAG CGA GTC GC                       |
| core-54-14 | AGA GCT GGA GCA AAC ACC TGA TTG CAA CAA ACC CAA AGA TCA              |
| core-34-29 | TCC CGG GGG TAC TTT TGC ATA GTA AAT AAC GCC AT                       |

|             |                                                                                  |
|-------------|----------------------------------------------------------------------------------|
| core-74-71  | GCG GCC AGC TTG AGT GAA AAG TGT                                                  |
| core-58-54  | AAA CTA ACG TCC GGG AGA ACC AAG TTA CAA AAC TG                                   |
| core-100-23 | GAT TGT GAT TGT GAT TGT TTT TTT TTT TGG GTA ACG CAA CTC TGG                      |
| core-87-34  | GAT TGT GAT TGT GAT TGT TTT TTT TTT CAA AAT CGA ACG TGT ACT                      |
| core-101-8  | GAT TGT GAT TGT GAT TGT TTT TTT TTT TAT ACA AGG CGT TAA CCC                      |
| core-86-2   | GAT TGT GAT TGT GAT TGT TTT TTT TTT CAT TTT TGA CCG GAA TTT TCA<br>GAG GTT T     |
| core-94-14  | GAT TGT GAT TGT GAT TGT TTT TTT TTT TGA GAG TGG TAG CTG GGA TCG<br>ATA TTC G     |
| core-81-28  | GAT TGT GAT TGT GAT TGT TTT TTT TTT TGC CTA AGC ATT AAG TCA                      |
| core-88-46  | GAT TGT GAT TGT GAT TGT TTT TTT TTT TTT TGC GTA AAG CTA ATT AAG<br>CAT           |
| core-95-63  | GAT TGT GAT TGT GAT TGT TTT TTT TTT AAG AAA CAC TTA AAT CCT TTG<br>CCC           |
| core-83-30  | ATT ACT GCA AGT GCA AAT TTT TTT TTT TCG GCC ATG ATT GCG AAT                      |
| core-98-25  | ATT ACT GCA AGT GCA AAT TTT TTT TTT CGA GCT CAG GGT TTT GA                       |
| core-90-11  | ATT ACT GCA AGT GCA AAT TTT TTT TTT GAG TAA TGG ATA AAT TAA                      |
| core-103-10 | ATT ACT GCA AGT GCA AAT TTT TTT TTT TGG TTT GGA CAA AGT TT                       |
| core-97-4   | ATT ACT GCA AGT GCA AAT TTT TTT TTT ACG CGC CTA CCG ACA TGG                      |
| core-104-62 | ATT ACT GCA AGT GCA AAT TTT TTT TTT TGA GGG GCA CCG TG                           |
| core-91-18  | ATT ACT GCA AGT GCA AAT TTT TTT TTT AAG AAA TAT ACT TCA GGT                      |
| core-82-31  | ATT ACT GCA AGT GCA AAT TTT TTT TTT ATA AAT CGA ATC GTA GAC TGG<br>AAA AAC CTA A |
| core-105-51 | CAG TAT CAG TAT CAG TAT TTT TTT TTT TAT GTA ATT TAT CAG ACG CTG<br>TGT A         |
| core-96-27  | CAG TAT CAG TAT CAG TAT TTT TTT TTT AAA GCC TTC GTA ATT CA                       |
| core-93-20  | CAG TAT CAG TAT CAG TAT TTT TTT TTT TTG TTT GAG AAG GAG GAA                      |
| core-85-32  | CAG TAT CAG TAT CAG TAT TTT TTT TTT CAC CGC CTC CGA AAC GAC                      |
| core-102-21 | CAG TAT CAG TAT CAG TAT TTT TTT TTT CAT TCA GCG ACA GTC TTA                      |
| core-99-6   | CAG TAT CAG TAT CAG TAT TTT TTT TTT ATT TTC GCT CAA CAC AGA                      |
| core-92-12  | CAG TAT CAG TAT CAG TAT TTT TTT TTT CCG TTC TGA GAA AGT GAC AAC<br>AGG TG        |
| core-84-1   | CAG TAT CAG TAT CAG TAT TTT TTT TTT CGC GTT TAT TAT AGT AG                       |
| core-122-77 | TGG ACT TAT ACT TGG ACT TAT TTT TTT TTT ACT ATC AAA AAT AGT GTT                  |
| core-113-35 | TGG ACT TAT ACT TGG ACT TAT TTT TTT TTT AGT ACC GAT AAG TAT CAG<br>AAG AAT GAC C |
| core-109-65 | TGG ACT TAT ACT TGG ACT TAT TTT TTT TTT GAT ATT CTG AAC GGG GGC<br>CTC GCC       |
| core-110-45 | TGG ACT TAT ACT TGG ACT TAT TTT TTT TTT TAG TAA ATT TCA ACA AAG                  |
| core-108-61 | TGG ACT TAT ACT TGG ACT TAT TTT TTT TTT ACA CTA ACG GAG ATT AAA                  |
| core-111-51 | TGG ACT TAT ACT TGG ACT TAT TTT TTT TTT GTC GCT GCC GAC AAG CCG<br>GAG AAT GCC T |



|             |                                                            |
|-------------|------------------------------------------------------------|
| core-52-107 | AAT GAC TTG AGA AAC CAT TTT TTT TTG TAC ACA TCA TTG TAA TC |
| core-73-106 | CGA GAA ACG ACA GTT ACT TTT TTT TTG TAC ACA TCA TTG TAA TC |

**Table S2. Sequences of poly-thymine (pT) passivated strands.** Names denote both the function of the staple strand and its position according to the line numbers in Figure S1: [function- 5' position – 3' position].

| Name     | Poly-thymine passivated strands 5' → 3'                                 |
|----------|-------------------------------------------------------------------------|
| pT-21-22 | TTT TTT TTT TTT TTT CTG ATA AAT TGT TGA CCA ACT TTG TTT TTT TTT TTT TTT |
| pT-37-40 | ACT TTC CAA CAT TTT GAT TAG CTC AAC ATG TTT TAA ATT TTT TTT TTT TTT T   |
| pT-45-8  | TTT TTT TTT TTT TTT GGC GCG AGC TGA AGT TTC AGC GGA TTT TTT TTT TTT TTT |
| pT-27-28 | TTT TTT TTT TTT TTT TAA TCA TTG TGA AAC GAA CTA TTT TTT TTT TTT TTT     |
| pT-36-1  | TTT TTT TTT TTT TTT AGA ACG GGT ATT CGG AAC CTA TTA TTT TTT TTT TTT TTT |
| pT-11-12 | TTT TTT TTT TTT TTT AAG GCT CCA AAA AAC AGC TTG ATA TTT TTT TTT TTT TTT |
| pT-74-73 | TTT TTT TTT TTT TTT GTA AGA ATA CGT GCC CTA AAA CAT TTT TTT TTT TTT TTT |
| pT-52-51 | TTT TTT TTT TTT TTT TTT TTT AAT CCT TAG AAT TTT TTT TTT TTT TTT         |
| pT-79-76 | TTT TTT TTT TTT TTT GTG TTG TTC CAG TTT GCC CGA GAG CAG GCG AAG C       |
| pT-38-37 | TTT GTC TTT CCT TAT CAT TCC ATT TTT TTT TTT TTT T                       |
| pT-6-43  | TTT TTT TTT TTT TTT CGC CAG CAT CCA TAT TTA TTT TTT TTT TTT TTT         |
| pT-0-34  | TTT TTT TTT TTT TTT TTC TGA AAC ATG AAA GTA TAG AAC GCC CAA             |
| pT-37-36 | TTT TTT TTT TTT TTT TTA AGA GGA AGC CCG AGA TT                          |
| pT-71-72 | TTT TTT TTT TTT TTT CAC AAT TCC ACA TGC GCT CAC TTT TTT TTT TTT TTT     |
| pT-34-33 | TTT TTT TTT TTT TTT TCA TTA CCG CGC GAG GCG TTT TAG TTT TTT TTT TTT TTT |
| pT-56-16 | TTT TTT TTT TTT TTT ACA GTA CCT TTT ACA TAG ATG AAA ATC                 |
| pT-18-59 | TTT TTT TTT TTT TTT TGT TAG CAA CCT ACC ATA TTT TTT TTT TTT TTT         |
| pT-4-5   | TCC ATG GAA AGC GCA GTC TTT TTT TTT TTT TTT T                           |
| pT-61-20 | TTT TTT TTT TTT TTT TTT CAT CAA CAT TTG TAT CAT CGC TTT TTT TTT TTT TTT |
| pT-7-7   | TTT TTT TTT TTT TTT CTT TCC AGA CGT                                     |
| pT-18-19 | AGA TCC TTA TTA CGC AGT ATT TTT TTT TTT TTT T                           |
| pT-61-62 | TGT GTA ATG GGA TAG GTC ACG TTT TTT TTT TTT TTT T                       |
| pT-41-4  | TTT TTT TTT TTT TTT TAT GCA ACT AAA TCG TCA CCA GTA TTT TTT TTT TTT TTT |
| pT-3-38  | TTT TTT TTT TTT TTT AGA ACC GCC ATT AGA GAG TTT TTT TTT TTT TTT         |
| pT-17-59 | TTT TTT TTT TTT TTT TTG AGG ACT AAA GAC TTT TCA CCA ACT TTT             |
| pT-20-61 | TTT TTT TTT TTT TTT AGA AGG AAA TGA TTA TCA TTT TTT TTT TTT TTT         |
| pT-30-29 | TTT TTT TTT TTT TTT ATC CTG AAT CTT ACA GCC ATA TTA TTT TTT TTT TTT TTT |

|          |                                                                         |
|----------|-------------------------------------------------------------------------|
| pT-16-58 | ACG GAT AAT CCG TTA ATA TTT TGT TAA AAT TTT TTT TTT TTT TT              |
| pT-2-36  | TTT TTT TTT TTT TTT GGG GTC AGT GCC TTG AGT ACC TAT TTA AAC             |
| pT-51-52 | TTT TTT TTT TTT TTT TAT TTT AAA TGC ACA GTC AAA TCA TTT TTT TTT TTT TTT |
| pT-43-6  | TTT TTT TTT TTT TTT TAG ATT TAG TTT AAG TTT TGT CGT TTT TTT TTT TTT TTT |
| pT-58-18 | TTT TTT TTT TTT TTT TCA AAA TTA TTT GCA CGT TAG AAA CGT                 |
| pT-39-3  | TTT TTT TTT TTT TTT TAC CTT TAA TTG CTC CGG TCA GGA CCC                 |
| pT-35-34 | TTT TTT TTT TTT TTT CTT TAA ACA GTT CAG AGA A                           |
| pT-76-75 | TTT TTT TTT TTT TTT AGA TTC ACC AGT TGA CCT GAA AGC TTT TTT TTT TTT TTT |
| pT-13-14 | TTT TTT TTT TTT TTT CCG ATA GTT GCG AGG CTT GCA GGG TTT TTT TTT TTT TTT |
| pT-49-50 | TTT TTT TTT TTT TTT CAT TAT GAC CCT AGA ACC CTC ATA TTT TTT TTT TTT TTT |
| pT-13-15 | AAT ACG GAA AAT TGA GGG AGG GAA GGT TTT TTT TTT TTT TT                  |
| pT-10-47 | TTT TTT TTT TTT TTT GCG TCA GAC ATA TAT TTT TTT TTT TTT TTT TTT         |
| pT-48-50 | TTT TTT TTT TTT TTT ACC TCC GGC TTA GGT TAG AGA CTC ATA                 |
| pT-24-23 | TTT TTT TTT TTT TTT ATT GAG CGC AAG AAA CAA TTT TTT TTT TTT TTT         |
| pT-63-64 | TTT TTT TTT TTT TTT TGG TGT AGA TGG CAG CTT TCC GGC TTT TTT TTT TTT TTT |
| pT-4-41  | TTT TTT TTT TTT TTT CTG AAT TTA CAG ACG ACG TTT TTT TTT TTT TTT         |
| pT-9-47  | TTT TTT TTT TTT TTT GTG AGA ATA GAA AGG AAC AGT TGA AAT TAG             |
| pT-36-0  | GCA TCG AGA GCT CAG TAC CAG GCG GAT TTT TTT TTT TTT TT                  |
| pT-12-11 | TTT TTT TTT TTT TTT CAC CAT TAC TTG CCT TTA TTT TTT TTT TTT TTT         |
| pT-31-32 | TTT TTT TTT TTT TTT TTA CGA GGC AAA AGA AGT TTT TTT TTT TTT TTT         |
| pT-36-35 | CAA TTT ATT TTC ATC GTA GGA ATT TTT TTT TTT TTT T                       |
| pT-62-63 | TTT TTT TTT TTT TTT GTT TGA GTA ACA TTA TGT TA                          |
| pT-25-26 | TTT TTT TTT TTT TTT AAC GTA ACA AAG TAA TTT CAA CTT TTT TTT TTT TTT TTT |
| pT-72-71 | TTT TTT TTT TTT TTT CGC CAT TAA AAA AAC ACC GCC TTT TTT TTT TTT TTT     |
| pT-22-21 | TTT TTT TTT TTT TTT TGA AAT AGC AAA GTT ACC TTT TTT TTT TTT TTT         |
| pT-3-2   | TCA CAG AAC CGC CAC CCT CTT TTT TTT TTT TTT T                           |
| pT-68-67 | TTT TTT TTT TTT TTT ATC AAA CCC GGT TAT CTA TTT TTT TTT TTT TTT         |
| pT-6-7   | CAG GCC ACC ACC AGA GCC GCT TTT TTT TTT TTT TT                          |
| pT-8-9   | CCT CAC CGG AAC CAG AGC CTT TTT TTT TTT TTT T                           |
| pT-16-57 | TTT TTT TTT TTT TTT TTT TGT CAC TAT ACA GTA TTT TTT TTT TTT TTT         |
| pT-54-55 | TAC TCG CGC AGA GGC GAA TTT TTT TTT TTT TTT T                           |
| pT-1-36  | TTT TTT TTT TTT TTT TAA GTG CCG TCA AAA AGA TTT TTT TTT TTT TTT         |
| pT-66-65 | TTT TTT TTT TTT TTT AAA TAT CTT GGA TTT AGA TTT TTT TTT TTT TTT         |
| pT-57-16 | TTT TTT TTT TTT TTT TGT ACC CCG GTT GCT ACA GAG GCT TTT TTT TTT TTT TTT |
| pT-4-42  | GTT GTA CGG TTC CCA ATT CTG CGA ACG AGT TTT TTT TTT TTT TT              |

|          |                                                                                |
|----------|--------------------------------------------------------------------------------|
| pT-55-56 | TTT TTT TTT TTT TTA GGC TAT CAG GTA ACT AGC ATG TCA ATC ATA TTT TTT TTT TTT TT |
| pT-59-18 | TTT TTT TTT TTT TTT TTC GCA TTA AAT CTA AAA CGA AAG TTT TTT TTT TTT TTT        |
| pT-64-63 | TTT TTT TTT TTT TTT AGT ATT AGA ATT TTA AAA TTT TTT TTT TTT TTT                |
| pT-33-34 | TTT TTT TTT TTT TTT TTT GCC AGA CCT CAA ATG TTT TTT TTT TTT TTT                |
| pT-40-4  | TTT TTT TTT TTT TTT ACA ATA AAC AAC ATG TTT CTG TCC CGT                        |
| pT-15-16 | TTT TTT TTT TTT TTT AGT TAA AGG CCG AGC A                                      |
| pT-8-45  | TTT TTT TTT TTT TTT ACC ACC GGA CAT AAT TAC TTT TTT TTT TTT TTT                |
| pT-38-3  | TTT TTT TTT TTT TTT TAA TAT CCC ATC ATA AGT TTT AAC TTT TTT TTT TTT TTT        |
| pT-23-24 | TTT TTT TTT TTT TTT AAA GAG GAC AGA ATT ACC CAA ATC TTT TTT TTT TTT TTT        |
| pT-47-10 | TTT TTT TTT TTT TTT CAA GGC AAA GAA ATC TCC AAA AAA TTT TTT TTT TTT TTT        |
| pT-73-74 | TTT TTT TTT TTT TTT TGC CCG CTT GGG CGC CAG TTT TTT TTT TTT TTT                |
| pT-47-48 | CAA AAA TCG GTT GTA CCA AAA ATT TTT TTT TTT TTT T                              |
| pT-65-66 | TTT TTT TTT TTT TTT ACC GCT TCT GGT TTC GCT ATT ACG TTT TTT TTT TTT TTT        |
| pT-50-49 | TTT TTT TTT TTT TTT CCT TGA AAA ACC TTT TTA TTT TTT TTT TTT TTT                |
| pT-16-17 | AAT CCA CGG AAT AAG TTT ATT TTT TTT TTT TTT T                                  |
| pT-29-30 | TTT TTT TTT TTT TTT ACG GAA CAA CAA AAG GAA TTT TTT TTT TTT TTT                |
| pT-42-6  | TTT TTT TTT TTT TTT ACA ACG CCA ACA TGT AAG AAT CGT GA                         |
| pT-32-31 | TTT TTT TTT TTT TTT CGA ACC TCC CGA AGC TAC AAT TTT TTT TTT TTT TTT TTT        |
| pT-43-44 | ATT TAG CTA TAT TTT CAT TTG GTT TTT TTT TTT TTT T                              |
| pT-19-19 | TTT TTT TTT TTT TTT AGG CAA AAG AAT                                            |
| pT-5-43  | TTT TTT TTT TTT TTT CAA ACT ACA ACG CCT GTA GCG ATC TAG ACC                    |
| pT-77-78 | TTT TTT TTT TTT TTT TTT GCC CCA TAG GGT TGA TTT TTT TTT TTT TTT                |
| pT-44-8  | TTT TTT TTT TTT TTT TAG AAA AAG CCT GTT TCC GGA ATA CCG                        |
| pT-34-79 | TAG AAA ACC GTC TAT CAA GCC ATT TTT TTT TTT TTT T                              |
| pT-46-10 | TTT TTT TTT TTT TTT AGT TAA TTT CAT CTT CTT TTC AAT GT                         |
| pT-70-69 | TTT TTT TTT TTT TTT TGC AAC AGT ACC TCA AAT TTT TTT TTT TTT TTT                |
| pT-40-39 | CTA AAG TCC TGA ACA AGA AAA ATT TTT TTT TTT TTT T                              |
| pT-54-53 | TTT TTT TTT TTT TTT TAT TCA TTT TGA ATT ACC TTT TTT TTT TTT TTT                |
| pT-60-61 | TTT TTT TTT TTT TTT GAT GAT GGC AAT TCA TAT A                                  |
| pT-75-76 | TTT TTT TTT TTT TTT GGT GGT TTT CCA CGC TGG TTT TTT TTT TTT TTT                |
| pT-78-77 | TTT TTT TTT TTT TTT TTG CAA CAG GAA ATT TAC ATT GGC TTT TTT TTT TTT TTT        |
| pT-53-54 | TTT TTT TTT TTT TTT CCA TCA ATA TGA AGA GAT CTA CAA TTT TTT TTT TTT TTT        |
| pT-26-25 | TTT TTT TTT TTT TTT ATA ACA TAA CAG AGG GTA TTT TTT TTT TTT TTT                |
| pT-45-46 | GTG ATC CAA TAA ATC ATA CAG GTT TTT TTT TTT TTT T                              |

|          |                                                                         |
|----------|-------------------------------------------------------------------------|
| pT-28-27 | TTT TTT TTT TTT TTT TTT ATC CCA ATC ACA GAG AGA TTT TTT TTT TTT TTT     |
| pT-59-60 | GTT TGG CCT TCC TGT AGC CAG CTT TTT TTT TTT TTT T                       |
| pT-69-70 | TTT TTT TTT TTT TTT TTG CAT GCC TGC TTG TTA TCC GCT TTT TTT TTT TTT TTT |
| pT-67-68 | TTT TTT TTT TTT TTT CCA GCT GGC GAA CCA GTG CCA AGC TTT TTT TTT TTT TTT |
| pT-14-13 | TTT TTT TTT TTT TTT TAA ATA TTG CAC CAG TAG TTT TTT TTT TTT TTT         |

**Table S3. Sequences of connector overhangs for 8 connectors on left side of origami.** Names denote the position of the connector in the folding map in Figure S1, with the line number being where the overhang protrudes from the origami (here: 3’).

| <b>Connector overhangs, left side, 8 connectors</b> |                                                                                  |
|-----------------------------------------------------|----------------------------------------------------------------------------------|
| <b>Name</b>                                         | <b>Sequence 5’→3’</b>                                                            |
| connector-left-72                                   | TTT TTT CAC AAT TCC ACA TGC GCT CAC TTT TTT TAG CTA CGT ATC TTC CAT              |
| connector-left-68                                   | TTT TTT CCA GCT GGC GAA CCA GTG CCA AGC TTT TTT TAG CTA CGT ATC TTC CAT          |
| connector-left-64                                   | TTT TTT TGG TGT AGA TGG CAG CTT TCC GGC TTT TTT TAG CTA CGT ATC TTC CAT          |
| connector-left-40                                   | ACT TTC CAA CAT TTT GAT TAG CTC AAC ATG TTT TAA A TT TTT TAG CTA CGT ATC TTC CAT |
| connector-left-44                                   | ATT TAG CTA TAT TTT CAT TTG G TTT TTT TAG CTA CGT ATC TTC CAT                    |
| connector-left-48                                   | CAA AAA TCG GTT GTA CCA AAA A TTT TTT TAG CTA CGT ATC TTC CAT                    |
| connector-left-56                                   | TTT TTT AGG CTA TCA GGT AAC TAG CAT GTA ATC ATA TTT TTT TAG CTA CGT ATC TTC CAT  |
| connector-left-78                                   | TTT TTT TTT GCC CCA TAG GGT TGA TTT TTT TAG CTA CGT ATC TTC CAT                  |

**Table S4. Sequences of connector overhangs for 8 connectors on right side of origami.** Names denote the position of the connector in the folding map in Figure S1, with the line number being where the overhang protrudes from the origami (here: 5').

| <b>Connector overhangs, right side, 8 connectors</b> |                                                                 |
|------------------------------------------------------|-----------------------------------------------------------------|
| <b>Name</b>                                          | <b>Sequence 5'→3'</b>                                           |
| connector-right-72                                   | TACCTTCTATGCATCGATTTTTTTTCGCCATTAACAAAAACACCGCCTTTTTTTTTTTTTTTT |
| connector-right-68                                   | TACCTTCTATGCATCGATTTTTTTATCAAACCCGGTTATCTATTTTTTTTTTTTTTTT      |
| connector-right-64                                   | TACCTTCTATGCATCGATTTTTTTAGTATTAGAATTTTAAAATTTTTTTTTTTTTTTT      |
| connector-right-40                                   | TACCTTCTATGCATCGATTTTTTTACAATAACAACATGTTTCTGTCCCGT              |
| connector-right-44                                   | TACCTTCTATGCATCGATTTTTTTAGAAAAAGCCTGTTTCCGGAATACCG              |
| connector-right-48                                   | TACCTTCTATGCATCGATTTTTTTACCTCCGGCTTAGGTTAGAGACTCATA             |
| connector-right-56                                   | TACCTTCTATGCATCGATTTTTTTACAGTACCTTTTACATAGATGAAAATC             |
| connector-right-78                                   | TACCTTCTATGCATCGATTTTTTTTGCAACAGGAAATTTACATTGGCTTTTTTTTTTTT     |

**Table S5. Sequences of connector overhangs for 16 connectors on left side of origami.** Names denote the position of the connector in the folding map in Figure S1, with the line number being where the overhang protrudes from the origami (here: 3').

| <b>Connector overhangs, left side, 16 connectors</b> |                                                           |
|------------------------------------------------------|-----------------------------------------------------------|
| <b>Name</b>                                          | <b>Sequence 5'→3'</b>                                     |
| connector-left-0                                     | GCATCGAGAGCTCAGTACCAGGCGGATTTTTTTTAGCTACGTATCTTCCAT       |
| connector-left-14                                    | TTTTTTTTTCCGATAGTTGCGAGGCTTGCAGGGTTTTTTTAGCTACGTATCTTCCAT |

|                   |                                                            |
|-------------------|------------------------------------------------------------|
| connector-left-8  | TTTTTTTTTGGCGCGAGCTGAAGTTTCAGCGGATTTTTTTAGCTACGTATCTTCCAT  |
| connector-left-4  | TTTTTTTTTTATGCAACTAAATCGTCACCAGTATTTTTTTAGCTACGTATCTTCCAT  |
| connector-left-30 | TTTTTTTTTACGGAACAACAAAAGGAATTTTTTTAGCTACGTATCTTCCAT        |
| connector-left-26 | TTTTTTTTTAAACGTAACAAAGTAATTTCAACTTTTTTTTTAGCTACGTATCTTCCAT |
| connector-left-22 | TTTTTTTTTCTGATAAATTGTTGACCAACTTTGTTTTTTTTAGCTACGTATCTTCCAT |
| connector-left-18 | TTTTTTTTTTTCGCATTAATCTAAAACGAAAGTTTTTTTAGCTACGTATCTTCCAT   |

**Table S6. Sequences of connector overhangs for 16 connectors on right side of origami.** Names denote the position of the connector in the folding map in Figure S1, with the line number being where the overhang protrudes from the origami (here: 5').

| <b>Connector overhangs, right side, 16 connectors</b> |                                                           |
|-------------------------------------------------------|-----------------------------------------------------------|
| <b>Name</b>                                           | <b>Sequence 5' → 3'</b>                                   |
| connector-right-0                                     | TACCTTCTATGCATCGATTTTTTTTTCTGAAACATGAAAGTATAGAACGCCCAA    |
| connector-right-14                                    | TACCTTCTATGCATCGATTTTTTTTAAATATTGCACCAGTAGTTTTTTTTT       |
| connector-right-8                                     | TACCTTCTATGCATCGATTTTTTTACCACCGGACATAAATACTTTTTTTTT       |
| connector-right-4                                     | TACCTTCTATGCATCGATTTTTTTCTGAATTTACAGACGACGTTTTTTTTT       |
| connector-right-30                                    | TACCTTCTATGCATCGATTTTTTTATCCTGAATCTTACAGCCATATTATTTTTTTTT |
| connector-right-26                                    | TACCTTCTATGCATCGATTTTTTTATAACATAACAGAGGGTATTTTTTTTTT      |
| connector-right-22                                    | TACCTTCTATGCATCGATTTTTTTTTGAAATAGCAAAGTTACCTTTTTTTTTT     |
| connector-right-18                                    | TACCTTCTATGCATCGATTTTTTTGTTAGCAACCTACCATATTTTTTTTTT       |

**Table S7. Sequences of connector overhangs for 24 connectors on left side of origami.** Names denote the position of the connector in the folding map in Figure S1, with the line number being where the overhang protrudes from the origami (here: 3').

| <b>Connector overhangs, left side, 24 connectors</b> |                                                                                     |
|------------------------------------------------------|-------------------------------------------------------------------------------------|
| <b>Name</b>                                          | <b>Sequence 5'→3'</b>                                                               |
| connector-left-38                                    | TTT TTT TTT TTT TTT AGA ACC GCC ATT AGA GAG TTT TTT TAG CTA CGT ATC TTC CAT         |
| connector-left-34                                    | TTT TTT TTT TTT TTT TTT GCC AGA CCT CAA ATG TTT TTT TAG CTA CGT ATC TTC CAT         |
| connector-left-32                                    | TTT TTT TTT TTT TTT TTA CGA GGC AAA AGA AGT TTT TTT TAG CTA CGT ATC TTC CAT         |
| connector-left-76                                    | TTT TTT TTT TTT TTT GGT GGT TTT CCA CGC TGG TTT TTT TAG CTA CGT ATC TTC CAT         |
| connector-left-50                                    | TTT TTT TTT TTT TTT CAT TAT GAC CCT AGA ACC CTC ATA TTT TTT TAG CTA CGT ATC TTC CAT |
| connector-left-52                                    | TTT TTT TTT TTT TTT TAT TTT AAA TGC ACA GTC AAA TCA TTT TTT TAG CTA CGT ATC TTC CAT |
| connector-left-58                                    | ACG GAT AAT CCG TTA ATA TTT TGT TAA AAT TTT TTT TAG CTA CGT ATC TTC CAT             |
| connector-left-60                                    | GTT TGG CCT TCC TGT AGC CAG C TTT TTT TAG CTA CGT ATC TTC CAT                       |

**Table S8. Sequences of connector overhangs for 24 connectors on right side of origami.** Names denote the position of the connector in the folding map in Figure S1, with the line number being where the overhang protrudes from the origami (here: 5').

| <b>Connector overhangs, right side, 24 connectors</b> |                                                                                     |
|-------------------------------------------------------|-------------------------------------------------------------------------------------|
| <b>Name</b>                                           | <b>Sequence 5'→3'</b>                                                               |
| connector-right-38                                    | TAC CTT CTA TGC ATC GAT TTT TTT TAA TAT CCC ATC ATA AGT TTT AAC TTT TTT TTT TTT TTT |
| connector-right-34                                    | TAC CTT CTA TGC ATC GAT TTT TTT TCA TTA CCG CGC GAG GCG TTT TAG TTT TTT TTT TTT TTT |
| connector-right-32                                    | TAC CTT CTA TGC ATC GAT TTT TTT CGA ACC TCC CGA AGC TAC AAT TTT TTT TTT TTT TTT TTT |

|                    |                                                                                     |
|--------------------|-------------------------------------------------------------------------------------|
| connector-right-76 | TAC CTT CTA TGC ATC GAT TTT TTT AGA TTC ACC AGT TGA CCT GAA AGC TTT TTT TTT TTT TTT |
| connector-right-50 | TAC CTT CTA TGC ATC GAT TTT TTT CCT TGA AAA ACC TTT TTA TTT TTT TTT TTT TTT         |
| connector-right-52 | TAC CTT CTA TGC ATC GAT TTT TTT TTT TTT AAT CCT TAG AAT TTT TTT TTT TTT TTT         |
| connector-right-58 | TAC CTT CTA TGC ATC GAT TTT TTT TCA AAA TTA TTT GCA CGT TAG AAA CGT                 |
| connector-right-60 | TAC CTT CTA TGC ATC GAT TTT TTT GAT GAT GGC AAT TCA TAT A                           |

**Table S9. Sequences of fluorophore modified connector overhangs.** Names denote the fluorophore modification and position of the connector in the folding map in Figure S1, with the line number being where the overhang protrudes from the origami.

| <b>Connector overhangs, fluorophore modified</b> |                                                                               |
|--------------------------------------------------|-------------------------------------------------------------------------------|
| <b>Name</b>                                      | <b>Sequence 5'→3'</b>                                                         |
| connector-left-28-AF568                          | TTT TTT TAA TCA TTG TGA AAC GAA CTA TTT TTT TAG CTA CGT ATC TTC CAT-AF568     |
| connector-right-28-AF647                         | AF647-TAC CTT CTA TGC ATC GAT TTT TTT TTTATCCCAATCACAGAGAGA TTT TTT           |
| connector-right-10-AF647                         | AF647-TAC CTT CTA TGC ATC GAT TTT TTT GCG TCA GAC ATA TAT TTT TTT TTT         |
| connector-left-10-AF568                          | TTT TTT CAA GGC AAA GAA ATC TCC AAA AAA TTT TTT TAG CTA CGT ATC TTC CAT-AF568 |
| connector-left-3-AF568                           | AF568-TAC CTT CTA TGC ATC GAT TTT TTT AGA ACC GCC ATT AGA GAG TTT TTT         |
| connector-right-3-AF647                          | T TAA TAT CCC ATC ATA AGT TTT AAC TTT TTT TAG CTA CGT ATC TTC CAT-AF647       |
| connector-left-20-AF568                          | T TTT CAT CAA CAT TTG TAT CAT CGC TTT TTT TAG CTA CGT ATC TTC CAT-AF568       |
| connector-right-20-AF647                         | AF647-TAC CTT CTA TGC ATC GAT TTT TTT AGA AGG AAA TGA TTA TCA TTT TTT         |
| connector-right-33-AF647                         | T TCA TTA CCG CGC GAG GCG TTT TAG TTT TTT TAG CTA CGT ATC TTC CAT-AF647       |



|                          |                                                                         |
|--------------------------|-------------------------------------------------------------------------|
| connector-left-33-AF568  | AF568-TAC CTT CTA TGC ATC GAT TTT TTT TTT GCC AGA CCT CAA ATG TTT TTT   |
| connector-left-16-AF568  | T TGT ACC CCG GTT GCT ACA GAG GCT TTT TTT TAG CTA CGT ATC TTC CAT-AF568 |
| connector-right-16-AF647 | AF647-TAC CTT CTA TGC ATC GAT TTT TTT TTT TGT CAC TAT ACA GTA TTT TTT   |

**Table S10. Sequences of fuel and antifuel strands.**

| Fuel and antifuel strands |                                                   |                       |
|---------------------------|---------------------------------------------------|-----------------------|
| Name                      | Sequence 5'→3'                                    | Hybridization length  |
| 5 nb fuel                 | AGGTAATGGA                                        | 5 nb                  |
| 8 nb fuel                 | AGAAGGTAATGGAAGA                                  | 8 nb                  |
| 11 nb fuel-toehold        | CATAGAAGGTAATGGAAGATAC AAT GAA ATT TAG GTA        | 11 nb + 15 nb toehold |
| 13 nb fuel                | TGCATAGAAGGTAATGGAAGATACGT                        | 13 nb                 |
| antifuel                  | TAC CTA AAT TTC ATT GTA TCT TCC ATT ACC TTC TAT G | 37 nb                 |

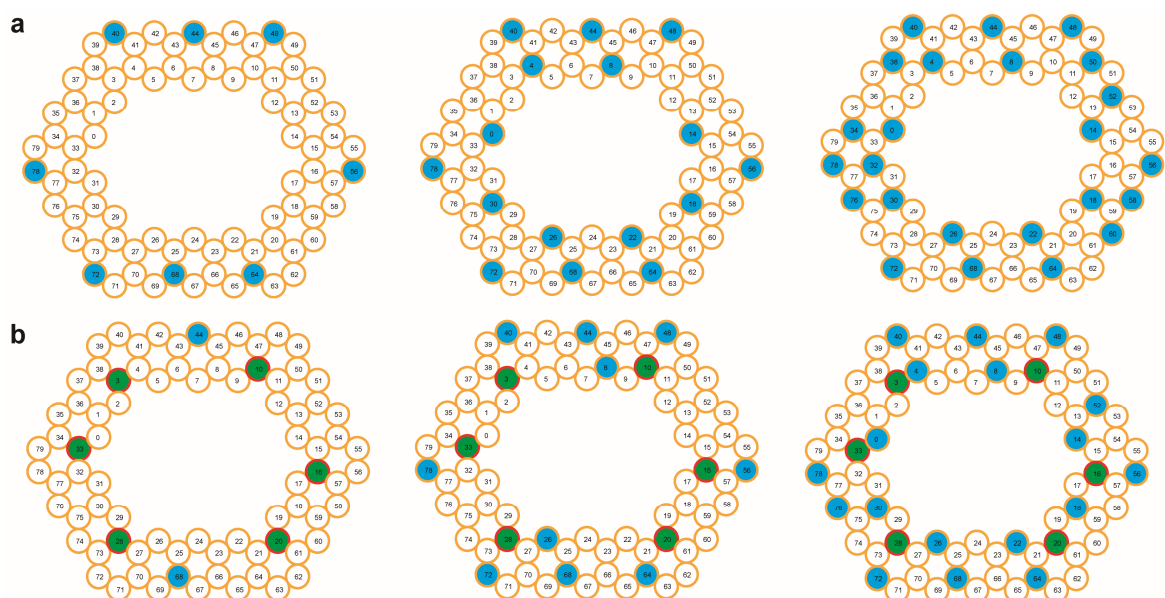

**Figure S2. Connector strand positions in the 3D-DNA-NC.** (a) Connector strand positions for 8, 16 and 24 connectors without any modifications. (b) Connector strand positions for 8, 16 and 24 connectors with 6 fluorophore modified connectors per side. Connector positions were adapted so that in case of a horizontal turn of 180° during annealing, FRET pairs can still align. The numbers in the cross section correlate with the line numbers in Figure S1.

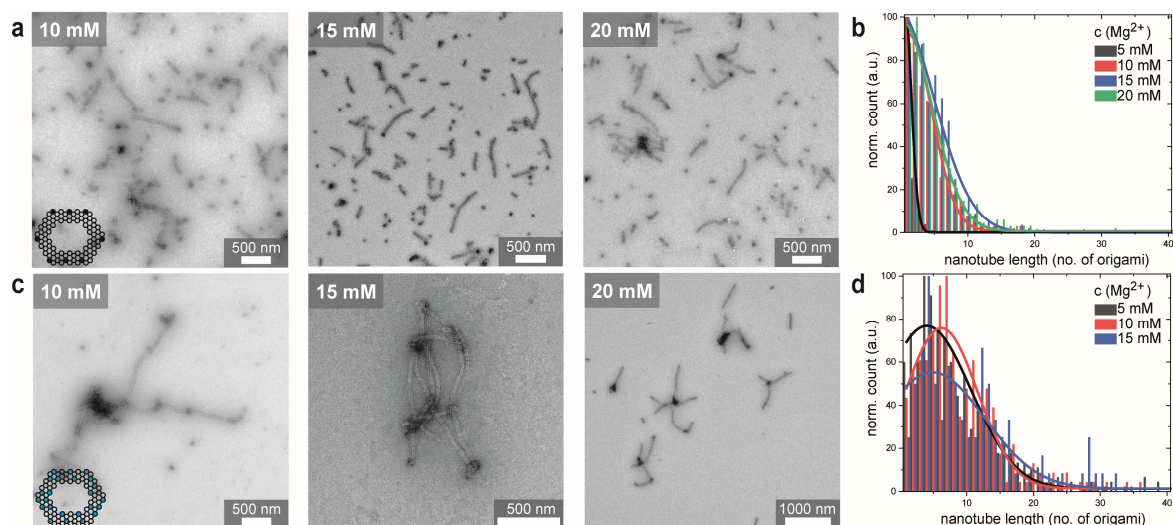

**Figure S3. TEM characterization of higher Mg<sup>2+</sup> concentration for *in situ* fibrillation with 8 and 24 connectors.** (a) TEM images for nanotubes with 8 connectors at 10, 15 and 20 mM Mg<sup>2+</sup>. (b) Statistical TEM image analysis of nanotube length distribution for *in situ* formed nanotubes with 8 connectors. (c) TEM images for nanotubes with 24 connectors at 10, 15 and 20 mM Mg<sup>2+</sup>. (d) Statistical TEM image analysis of nanotube length distribution for *in situ* formed nanotubes with 24 connectors. The sample with 20 mM Mg<sup>2+</sup> showed strong aggregation of nanotubes and was therefore not evaluated statistically. All nanotubes are polymerized with 22 nb fuel. All nanotubes were formed *in situ* at a total concentration of 20 nM, purified and were further incubated for 2 days at 37 °C.

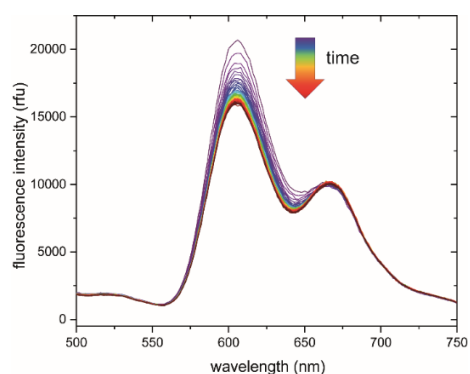

**Figure S4. Reference spectrum for FRET.** Fluorescence spectrum of polymerization of 24 connector 3D-DNA-NC with 22 nb fuel at 25 °C and 10 nM.

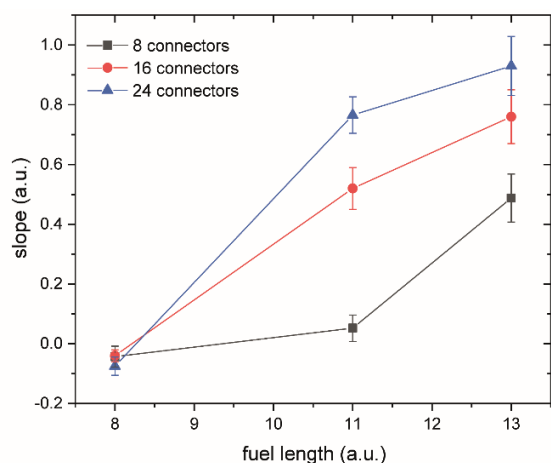

**Figure S5. Initial slope and FRET ratio increase for time-resolved FRET measurements.** Initial slope for polymerization with different connectors and different hybridization lengths at 37 °C. Slope is calculated from linear fitting of the first 4 min of the time-resolved curves.

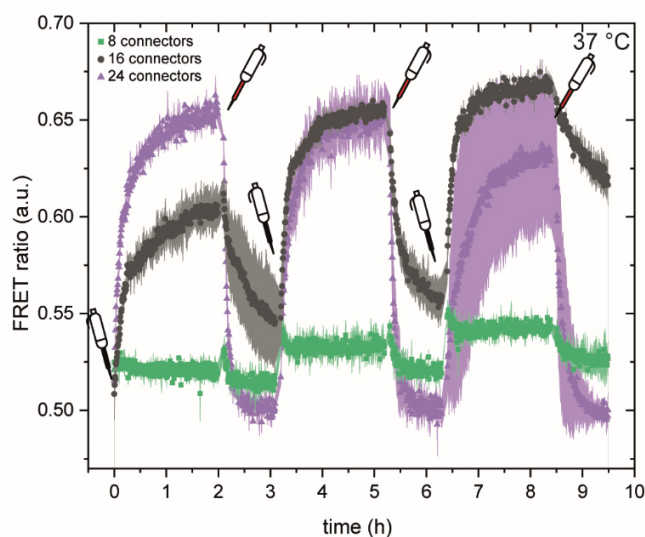

**Figure S6. In situ monitoring of reversible nanotube polymerization at 37 °C by FRET.** Time-resolved FRET ratio showing repeated addition of fuel and antifuel at 37 °C for different connector densities. The measurements are an average of two, the shaded area is the standard deviation. Origami concentrations are 10 nM at 5 mM  $Mg^{2+}$ .

### Note S1: Adjustments of brightness and contrast in images

Figure 4a bottom left: brightness reduced by 20 %, contrast increased by 20 %

Figure 4a top right: brightness reduced by 20 %, contrast increased by 20 %
